# Supplementary material
Source: ML conference proceedings conference paper supplement (https://openaccess.thecvf.com/content/CVPR2024/html/Tang_AMU-Tuning_Effective_Logit_CVPR_2024_paper.html)
Supplement: Supplementary file [file Tang_AMU-Tuning_Effective_Logit_CVPR_2024_supplemental.pdf]

# Supplementary Material for AMU-Tuning: Effective Logit Bias for CLIP-based Few-shot Learning

Yuwei Tang\*, Zhenyi Lin\*, Qilong Wang†, Pengfei Zhu, Qinghua Hu

Tianjin Key Lab of Machine Learning, College of Intelligence and Computing, Tianjin University, China  
{tangyuwei, linzhenyi, qlwang, zhupengfei, huqinghua}@tju.edu.cn

In the supplementary material, we conduct more experiments to further investigate the effectiveness of our AMU-Tuning method. Specifically, we first analyze the computation complexity of AMU-Tuning, and then compare the MTFi predictor with LP by using various backbone models. Subsequently, we conduct the analysis on the effect of hyper-parameters  $\lambda$  and  $\rho$  in the AMU-Tuning method. Finally, we compare different methods to compute the confidence  $\kappa$  in uncertainty fusion of Eq. (11). Note that all experiments are conducted on ImageNet-1K.

## S1. Analysis on Computation Complexity.

In this section, we compare AMU-Tuning with its counterparts in terms of computation complexity on a single RTX 3090 GPU, including training time over 500 steps with batch size of 16384 and number of trainable parameters. Tab. S1 gives the results under 16-shot setting, where we can see that AMU-Tuning has the fastest training speed and the fewest trainable parameters, since AMU-Tuning only optimizes a lightweight LP. These results verify the efficiency of our AMU-Tuning.

| Model             | Time (s) ↓  | Params. (M) ↓ |
|-------------------|-------------|---------------|
| Tip-Adapter-F [7] | 22.30       | 16.38         |
| CaFo [8]          | 87.88       | 49.15         |
| AMU-Tuning (Ours) | <b>6.63</b> | <b>2.05</b>   |

Table S1. Computational complexity of different methods in terms of training time (Time) and trainable parameters (Params.).

\* Equal contributions made by Y. Tang and Z. Lin, † Corresponding author is Q. Wang. This work was supported in part by National Natural Science Foundation of China under Grants 62276186, 61925602, 62222608, in part by CAAI-Huawei MindSpore Open Fund under Grant CAAIXSJLJJ-2022-010 C, in part by Tianjin Natural Science Funds for Distinguished Young Scholar under Grant 23JCJQC00270, and in part by the Haihe Lab of ITAI under Grant 22HHXCJC00002.

## S2. Comparison of MTFi with LP Using Different Backbones

In this section, we conduct an in-depth analysis using extra backbones (i.e., DINO [1] and MAE [4]) to evaluate the effectiveness of MTFi on ImageNet-1K [3]. Specifically, Tab. S2 respectively shows the results of linear probing (LP) and our MTFi predictors with auxiliary features of DINO and MAE, while apparent that the implementation of MTFi leads to a remarkable boost in the model’s performance.

| Method      | 1-shot       | 4-shot       | 16-shot      |
|-------------|--------------|--------------|--------------|
| MAE [4]+LP  | 61.20        | 62.76        | 65.49        |
| MAE + MTFi  | <b>61.44</b> | <b>63.32</b> | <b>65.99</b> |
| DINO [1]+LP | 61.62        | 64.43        | 68.32        |
| DINO+MTFi   | <b>61.97</b> | <b>65.05</b> | <b>69.21</b> |

Table S2. Comparison(%) of MTFi in extra backbones.

Furthermore, we visualize the loss convergence curves for the DINO mode with MTFi trained in the 16-shot setting. As shown in Fig. S1 both  $\ell_{\text{total}}$  and  $\ell_{\text{Aux}}$  convergence faster, while the individual accuracy (%) of the auxiliary branch increases from 36.24 to 57.79, and the overall model accuracy (%) improves from 68.32 to 69.21. The above results demonstrate that our MTFi can achieve significant performance improvement while benefitting higher training efficiency (e.g., DINO).

## S3. Effect of Parameter $\lambda$

In Eq. (9), we introduce a hyper-parameter  $\lambda$  that balance the effect between  $\ell_{\text{Aux}}$  and  $\ell_{\text{Fusion}}$ . In Fig. S2, we examine the performance of the AMU-Tuning method with 4-shot and 16-shot on ImageNet-1K under various values of  $\lambda$ . It is evident that the performance of AMU-Tuning method remains stable when  $\lambda$  is in the range of 0.2 to 0.6, with fluctuations below 0.05%. Therefore, we generally set  $\lambda$  to 0.4 throughout our experiments.

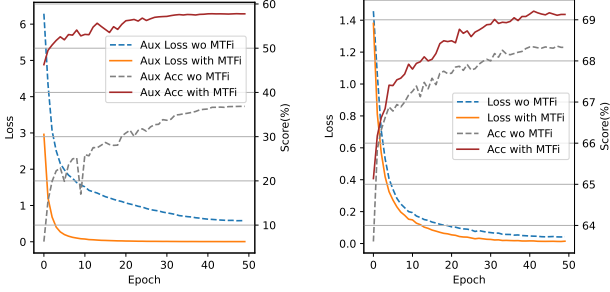

(a) Loss and accuracy of auxiliary (b) Loss and accuracy overall model branch

Figure S1. Comparison of loss and accuracy curves with/without the MTFi method. (a) is auxiliary loss and accuracy curve, while (b) is total loss and accuracy curve.

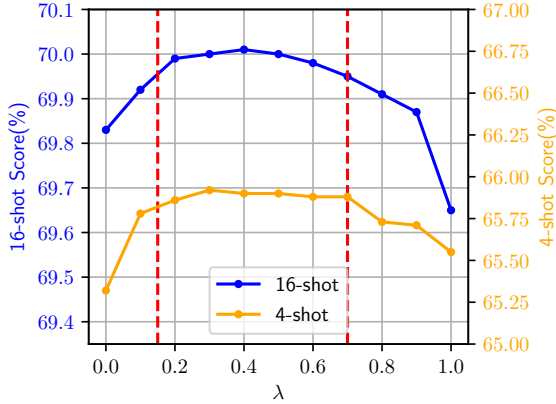

Figure S2. Comparison on AMU-Tuning with different  $\lambda$ .

## S4. Effect of Parameter $\rho$

In Eq. (10), we introduce a hyper-parameter  $\rho$  to control the power of uncertainty. In Fig. S2, we examine the performance of the AMU model with 16-shot on ImageNet-1K under various values of  $\rho$ . It is evident that the performance of AMU performance stable when  $\rho$  is in the range of 0.2 to 0.6. In our experiments, we generally set  $\rho$  to 0.4.

## S5. Comparison of Different Uncertainty-based Fusion Methods

According to the observation in Sec. 3.2.3, we have that the largest logit value of zero-shot CLIP is consistently high, when the sample is correctly classified. Therefore, we devise various approaches for calculating the confidence parameter  $\kappa$ . First, we compute the confidence score  $\kappa$  based on the largest logit value directly which formularized as

$$\kappa_{\text{Max}} = \text{Max1}(\mathbf{s}_0)^\rho, \quad (\text{S1})$$

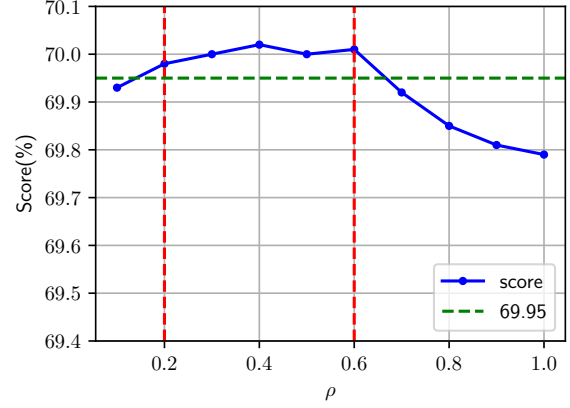

Figure S3. Comparison on AMU-Tuning with different  $\rho$ .

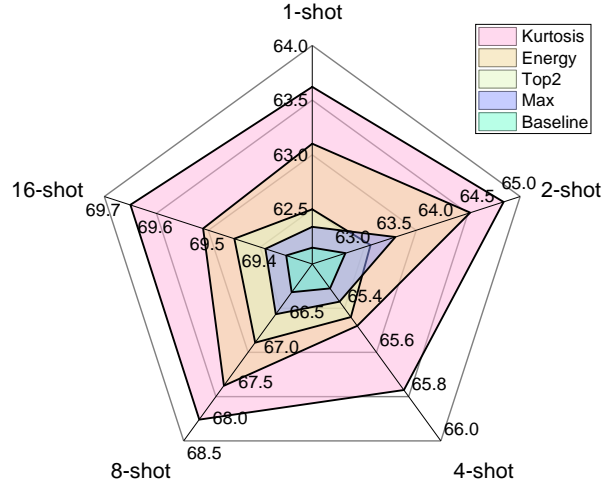

Figure S4. Comparison(%) of different confidence calculation methods.

where  $\text{Max1}(\cdot)$  computes the largest logit value. Furthermore, we also design a method that simultaneously utilizes the largest and second largest logit values, as suggested in [6]. The formula is as follows:

$$\kappa_{\text{Top2}} = \left( \frac{\text{Max1}(\mathbf{s}_0) - \text{Max2}(\mathbf{s}_0)}{\text{abs}(\text{Max1}(\mathbf{s}_0) + \text{Max2}(\mathbf{s}_0))} \right)^\rho, \quad (\text{S2})$$

$\text{Max2}(\cdot)$  computes the second largest logit value. We also explore a confidence calculation method based on energy [5], for  $C$  classes  $\kappa$  formulated as follows:

$$\kappa_{\text{Energy}} = \left( \log \sum_{i=1}^C e^{s_0^i} \right)^\rho. \quad (\text{S3})$$

We compare different methods in Eqs. (S1) to (S3) and our kurtosis-based confidence in Eq. (10) on ImageNet-1K with the auxiliary features of MoCov3 [2]. As present

in Fig. S4 several confidence computation methods can lead to performance improvement while our kurtosis-based approach achieves the better performance than other compared methods for all cases.

## References

- [1] Mathilde Caron, Hugo Touvron, Ishan Misra, Hervé Jégou, Julien Mairal, Piotr Bojanowski, and Armand Joulin. Emerging properties in self-supervised vision transformers. In *ICCV*, pages 9650–9660, 2021. [1](#)
- [2] Xinlei Chen, Saining Xie, and Kaiming He. An empirical study of training self-supervised vision transformers. In *ICCV*, pages 9640–9649, 2021. [2](#)
- [3] Jia Deng, Wei Dong, Richard Socher, Li-Jia Li, Kai Li, and Li Fei-Fei. ImageNet: A large-scale hierarchical image database. In *CVPR*, pages 248–255. Ieee, 2009. [1](#)
- [4] Kaiming He, Xinlei Chen, Saining Xie, Yanghao Li, Piotr Dollár, and Ross Girshick. Masked autoencoders are scalable vision learners. In *CVPR*, pages 16000–16009, 2022. [1](#)
- [5] Weitang Liu, Xiaoyun Wang, John Owens, and Yixuan Li. Energy-based out-of-distribution detection. In *Advances in Neural Information Processing Systems*, pages 21464–21475. Curran Associates, Inc., 2020. [2](#)
- [6] Abdel Aziz Taha, Leonhard Hennig, and Petr Knoth. Confidence estimation of classification based on the distribution of the neural network output layer. *arXiv preprint arXiv:2210.07745*, 2022. [2](#)
- [7] Renrui Zhang, Wei Zhang, Rongyao Fang, Peng Gao, Kunchang Li, Jifeng Dai, Yu Qiao, and Hongsheng Li. Tip-Adapter: Training-free adaption of clip for few-shot classification. In *ECCV*, pages 493–510. Springer, 2022. [1](#)
- [8] Renrui Zhang, Xiangfei Hu, Bohao Li, Siyuan Huang, Hanqiu Deng, Yu Qiao, Peng Gao, and Hongsheng Li. Prompt, generate, then cache: Cascade of foundation models makes strong few-shot learners. In *CVPR*, pages 15211–15222, 2023. [1](#)
